# Supplementary material for: Assessment of variation in immunosuppressive pathway genes reveals TGFBR2 to be associated with risk of clear cell ovarian cancer
Source: PubMed Central journal article supplement (PMC5340115; doi:10.18632/oncotarget.10215), 2016-06-21
Supplement: oncotarget-07-69097-s001.pdf [file oncotarget-07-69097-s001.pdf]

# Assessment of variation in immunosuppressive pathway genes reveals TGFBR2 to be associated with risk of clear cell ovarian cancer

## Supplementary Material

**Supplemental Table 1. Most significant single SNP associations by gene for all SNPs in the Treg cell pathway**

| Gene           | All Histotypes |       |       |         |      | Serous     |       |       |         |      | Endometrioid |       |       |         |      | Clear cell |       |       |         |      | Invasive Mucinous |       |       |         |      |
|----------------|----------------|-------|-------|---------|------|------------|-------|-------|---------|------|--------------|-------|-------|---------|------|------------|-------|-------|---------|------|-------------------|-------|-------|---------|------|
|                | SNP            | P     | EAF   | Eff/Ref | OR   | SNP        | P     | EAF   | Eff/Ref | OR   | SNP          | P     | EAF   | Eff/Ref | OR   | SNP        | P     | EAF   | Eff/Ref | OR   | SNP               | P     | EAF   | Eff/Ref | OR   |
| <i>CTLA4</i>   | rs3087243      | 0.478 | 0.442 | A/G     | 1.01 | rs11571317 | 0.705 | 0.071 | T/C     | 0.99 | rs231777     | 0.134 | 0.851 | C/T     | 0.94 | rs3087243  | 0.215 | 0.442 | A/G     | 1.06 | rs3087243         | 0.253 | 0.442 | A/G     | 0.95 |
| <i>FCRL3</i>   | rs1537947      | 0.033 | 0.214 | C/G     | 0.96 | rs11264793 | 0.041 | 0.237 | T/A     | 0.96 | rs6691569    | 0.104 | 0.270 | A/G     | 1.06 | rs6691569  | 0.228 | 0.270 | A/G     | 1.06 | rs11264798        | 0.056 | 0.504 | G/C     | 1.09 |
| <i>FOXP3</i>   | rs2280883      | 0.334 | 0.437 | C/T     | 1.01 | rs2280883  | 0.274 | 0.437 | C/T     | 1.02 | rs3761549    | 0.719 | 0.125 | A/G     | 0.98 | rs3761549  | 0.537 | 0.125 | A/G     | 0.96 | rs3761549         | 0.176 | 0.125 | A/G     | 1.09 |
| <i>GZMB</i>    | rs8192920      | 0.144 | 0.244 | A/C     | 1.03 | rs7144366  | 0.147 | 0.598 | C/T     | 1.03 | rs10873219   | 0.159 | 0.199 | T/G     | 1.06 | rs8192920  | 0.336 | 0.244 | A/C     | 1.05 | rs7144366         | 0.415 | 0.598 | C/T     | 1.04 |
| <i>HDAC9</i>   | rs6973918      | 0.006 | 0.878 | G/A     | 1.07 | rs2190273  | 0.003 | 0.878 | C/T     | 1.09 | rs957958     | 0.001 | 0.389 | G/A     | 0.89 | rs7802855  | 0.008 | 0.396 | C/T     | 0.88 | rs12672843        | 0.033 | 0.047 | C/G     | 1.28 |
| <i>IL12B</i>   | rs6894567      | 0.002 | 0.198 | G/A     | 1.06 | rs6894567  | 0.009 | 0.198 | G/A     | 1.06 | rs1003199    | 0.045 | 0.502 | T/C     | 0.94 | rs2569253  | 0.245 | 0.508 | C/T     | 0.95 | rs2546892         | 0.007 | 0.166 | A/G     | 0.84 |
| <i>IL17RA</i>  | rs879574       | 0.057 | 0.112 | A/T     | 1.04 | rs13053889 | 0.013 | 0.196 | T/C     | 0.95 | rs13053889   | 0.173 | 0.196 | T/C     | 1.06 | rs2241044  | 0.317 | 0.516 | C/A     | 1.05 | rs5748863         | 0.168 | 0.655 | A/G     | 0.93 |
| <i>IL23A</i>   | rs11171806     | 0.408 | 0.069 | A/G     | 1.02 | rs11171806 | 0.359 | 0.069 | A/G     | 1.03 | rs11171806   | 0.639 | 0.069 | A/G     | 1.03 | rs11171806 | 0.453 | 0.069 | A/G     | 0.93 | rs11171806        | 0.856 | 0.069 | A/G     | 0.98 |
| <i>IL23R</i>   | rs10889664     | 0.024 | 0.337 | T/C     | 1.04 | rs10889675 | 0.017 | 0.112 | A/C     | 1.07 | rs12401432   | 0.057 | 0.299 | G/C     | 1.07 | rs4655686  | 0.032 | 0.300 | A/T     | 1.11 | rs1343151         | 0.010 | 0.343 | A/G     | 0.88 |
| <i>IL2RA</i>   | rs2476491      | 0.080 | 0.302 | T/A     | 0.97 | rs2031229  | 0.149 | 0.229 | A/G     | 0.97 | rs7072398    | 0.020 | 0.472 | A/G     | 0.93 | rs11256456 | 0.015 | 0.210 | C/T     | 1.14 | rs12722527        | 0.056 | 0.160 | T/C     | 1.12 |
| <i>IL7</i>     | rs17505589     | 0.097 | 0.098 | T/C     | 1.04 | rs17505589 | 0.036 | 0.098 | T/C     | 1.06 | rs2887501    | 0.095 | 0.099 | C/A     | 1.09 | rs2583759  | 0.336 | 0.189 | C/T     | 0.94 | rs3888020         | 0.149 | 0.380 | A/C     | 1.07 |
| <i>IL7R</i>    | rs6891095      | 0.099 | 0.140 | C/T     | 0.96 | rs10053847 | 0.040 | 0.141 | A/G     | 0.95 | rs6891095    | 0.035 | 0.140 | C/T     | 0.90 | rs6891095  | 0.239 | 0.140 | C/T     | 1.08 | rs11567762        | 0.304 | 0.141 | A/G     | 0.93 |
| <i>IL8RA</i>   | rs3138060      | 0.099 | 0.051 | C/G     | 1.06 | rs3138060  | 0.142 | 0.051 | C/G     | 1.06 | rs1567868    | 0.012 | 0.949 | A/G     | 0.84 | rs1008563  | 0.047 | 0.434 | A/G     | 1.10 | rs3138060         | 0.100 | 0.051 | C/G     | 0.83 |
| <i>LGALS1</i>  | rs9622682      | 0.055 | 0.433 | A/G     | 0.97 | rs9622682  | 0.154 | 0.433 | A/G     | 0.98 | rs929039     | 0.773 | 0.339 | C/T     | 0.99 | rs4820294  | 0.786 | 0.339 | A/G     | 1.01 | rs9622682         | 0.023 | 0.433 | A/G     | 0.90 |
| <i>LGALS9</i>  | rs3763959      | 0.345 | 0.567 | G/A     | 0.99 | rs4239242  | 0.270 | 0.363 | C/T     | 1.02 | rs3763959    | 0.107 | 0.567 | G/A     | 0.95 | rs4794976  | 0.667 | 0.308 | G/T     | 0.98 | rs4239242         | 0.023 | 0.363 | C/T     | 0.90 |
| <i>PRKCQ</i>   | rs6602820      | 0.059 | 0.570 | A/G     | 1.03 | rs4750517  | 0.057 | 0.318 | G/A     | 1.04 | rs943452     | 0.082 | 0.378 | T/C     | 1.06 | rs11259403 | 0.069 | 0.665 | T/C     | 0.92 | rs2026431         | 0.012 | 0.299 | T/G     | 1.13 |
| <i>STAT5A</i>  | rs9906989      | 0.039 | 0.170 | T/G     | 0.96 | rs9906989  | 0.061 | 0.170 | T/G     | 0.96 | rs2293158    | 0.251 | 0.283 | C/T     | 0.96 | rs16967637 | 0.044 | 0.283 | A/C     | 1.10 | rs7217728         | 0.117 | 0.285 | C/T     | 0.92 |
| <i>STAT5B</i>  | rs17591972     | 0.180 | 0.086 | G/A     | 0.96 | rs17591972 | 0.252 | 0.086 | G/A     | 0.96 | rs9907247    | 0.220 | 0.288 | A/G     | 0.96 | rs16967611 | 0.050 | 0.291 | G/A     | 1.10 | rs8064638         | 0.083 | 0.290 | A/G     | 0.92 |
| <i>TGFB1</i>   | rs8179181      | 0.268 | 0.230 | A/G     | 0.98 | rs8179181  | 0.312 | 0.230 | A/G     | 0.98 | rs8110090    | 0.162 | 0.054 | G/A     | 0.90 | rs8179181  | 0.321 | 0.230 | A/G     | 1.05 | rs8179181         | 0.044 | 0.230 | A/G     | 0.90 |
| <i>TGFB2</i>   | rs4335431      | 0.019 | 0.077 | C/T     | 0.94 | rs2027566  | 0.028 | 0.676 | A/C     | 0.96 | rs12029576   | 0.121 | 0.708 | A/C     | 1.06 | rs1417488  | 0.004 | 0.250 | T/C     | 0.85 | rs2799086         | 0.065 | 0.134 | T/C     | 0.88 |
| <i>TGFB3</i>   | rs3917148      | 0.239 | 0.078 | G/T     | 1.03 | rs3917148  | 0.072 | 0.078 | G/T     | 1.06 | rs11466414   | 0.089 | 0.057 | A/G     | 0.89 | rs3917158  | 0.165 | 0.833 | C/T     | 1.09 | rs3917148         | 0.304 | 0.078 | G/T     | 0.91 |
| <i>TGFBRI</i>  | rs10512263     | 0.044 | 0.069 | C/T     | 1.06 | rs10512263 | 0.016 | 0.069 | C/T     | 1.08 | rs10733710   | 0.042 | 0.221 | A/G     | 0.92 | rs928180   | 0.118 | 0.090 | G/A     | 0.88 | rs928180          | 0.008 | 0.090 | G/A     | 1.22 |
| <i>TGFB2</i>   | rs11466515     | 0.196 | 0.309 | C/A     | 0.98 | rs3773645  | 0.106 | 0.313 | G/C     | 0.97 | rs12493607   | 0.001 | 0.340 | C/G     | 0.89 | rs3773636  | 0.001 | 0.260 | T/C     | 1.21 | rs9790268         | 0.002 | 0.453 | T/C     | 1.16 |
| <i>TGFB3</i>   | rs2029356      | 0.025 | 0.746 | C/T     | 0.96 | rs12089918 | 0.012 | 0.216 | G/C     | 0.95 | rs6678564    | 0.014 | 0.088 | C/G     | 0.86 | rs284172   | 0.013 | 0.846 | T/A     | 0.86 | rs1805117         | 0.019 | 0.175 | C/T     | 1.15 |
| <i>TNFSF14</i> | rs12609318     | 0.331 | 0.248 | A/G     | 0.98 | rs12609318 | 0.386 | 0.248 | A/G     | 0.98 | rs11878563   | 0.343 | 0.571 | G/A     | 0.97 | rs8106574  | 0.439 | 0.770 | C/T     | 1.04 | rs1077667         | 0.474 | 0.211 | T/C     | 1.04 |

SNP= most significantly associated SNP in gene; p=p-value from single SNP test of association; EAF=Effect allele frequency; Eff/Ref=Effect allele/Reference allele; OR=Odds ratio for each additional copy of the effect allele

**Supplemental Table 2. Tag SNPs per gene in Treg cell pathway  
(n=1351)**

| <b>Gene</b>   | <b>Tag SNPs</b> | <b>Gene</b>    | <b>Tag SNPs</b> |
|---------------|-----------------|----------------|-----------------|
| <i>CTLA4</i>  | 5               | <i>LGALS1</i>  | 3               |
| <i>FCRL3</i>  | 14              | <i>LGALS9</i>  | 11              |
| <i>FOXP3</i>  | 4               | <i>PRKCQ</i>   | 145             |
| <i>GZMB</i>   | 9               | <i>STAT5A</i>  | 7               |
| <i>HDAC9</i>  | 418             | <i>STAT5B</i>  | 16              |
| <i>IL12B</i>  | 21              | <i>TGFB1</i>   | 6               |
| <i>IL17RA</i> | 20              | <i>TGFB2</i>   | 55              |
| <i>IL23A</i>  | 1               | <i>TGFB3</i>   | 18              |
| <i>IL23R</i>  | 58              | <i>TGFBR1</i>  | 37              |
| <i>IL2RA</i>  | 55              | <i>TGFBR2</i>  | 110             |
| <i>IL7</i>    | 38              | <i>TGFBR3</i>  | 255             |
| <i>IL7R</i>   | 34              | <i>TNFSF14</i> | 4               |
| <i>IL8RA</i>  | 7               |                |                 |

**Supplemental Table 3. Frequency distribution of controls and cases by histologic subtypes in 40 studies participating in the Ovarian Cancer Association Consortium**

| Study | Control<br>N  | All case<br>N  | Histological subtypes |               |                   |              |                 |              | Total |
|-------|---------------|----------------|-----------------------|---------------|-------------------|--------------|-----------------|--------------|-------|
|       |               |                | Serous<br>N           | Mucinous<br>N | Endometrioid<br>N | Clear<br>N   | Mixed Cell<br>N | Other<br>N   |       |
|       | %             | %              | %                     | %             | %                 | %            | %               | %            |       |
| AUS   | 978<br>(4.21) | 848<br>(5.44)  | 561<br>(6.01)         | 38<br>(2.39)  | 112<br>(5.34)     | 52<br>(5.03) | 60<br>(11.88)   | 25<br>(2.41) | 848   |
| BAV   | 143<br>(0.62) | 97<br>(0.62)   | 60<br>(0.64)          | 9<br>(0.57)   | 13<br>(0.62)      | 6<br>(0.58)  | 0<br>(0)        | 9<br>(0.87)  | 97    |
| BEL   | 1347<br>(5.8) | 272<br>(1.74)  | 194<br>(2.08)         | 23<br>(1.44)  | 22<br>(1.05)      | 23<br>(2.23) | 8<br>(1.58)     | 2<br>(0.19)  | 272   |
| DOV   | 1487<br>(6.4) | 1084<br>(6.95) | 710<br>(7.61)         | 149<br>(9.36) | 160<br>(7.62)     | 65<br>(6.29) | 0<br>(0)        | 0<br>(0)     | 1084  |
| GER   | 413<br>(1.78) | 209<br>(1.34)  | 108<br>(1.16)         | 29<br>(1.82)  | 21<br>(1)         | 6<br>(0.58)  | 2<br>(0.4)      | 43<br>(4.15) | 209   |
| GRR   | 0<br>(0)      | 106<br>(0.68)  | 72<br>(0.77)          | 5<br>(0.31)   | 18<br>(0.86)      | 10<br>(0.97) | 1<br>(0.2)      | 0<br>(0)     | 106   |
| HAW   | 157<br>(0.68) | 80<br>(0.51)   | 46<br>(0.49)          | 15<br>(0.94)  | 12<br>(0.57)      | 5<br>(0.48)  | 2<br>(0.4)      | 0<br>(0)     | 80    |

|     |                |               |               |               |              |              |               |              |     |
|-----|----------------|---------------|---------------|---------------|--------------|--------------|---------------|--------------|-----|
| HJO | 273<br>(1.17)  | 245<br>(1.57) | 146<br>(1.56) | 14<br>(0.88)  | 26<br>(1.24) | 4<br>(0.39)  | 11<br>(2.18)  | 44<br>(4.24) | 245 |
| HMO | 138<br>(0.59)  | 142<br>(0.91) | 50<br>(0.54)  | 7<br>(0.44)   | 12<br>(0.57) | 1<br>(0.1)   | 0<br>(0)      | 72<br>(6.94) | 142 |
| HOC | 447<br>(1.92)  | 224<br>(1.44) | 120<br>(1.29) | 44<br>(2.76)  | 29<br>(1.38) | 13<br>(1.26) | 0<br>(0)      | 18<br>(1.74) | 224 |
| HOP | 1466<br>(6.31) | 678<br>(4.35) | 416<br>(4.46) | 52<br>(3.27)  | 85<br>(4.05) | 44<br>(4.26) | 68<br>(13.47) | 13<br>(1.25) | 678 |
| HSK | 0<br>0         | 150<br>0.96   | 116<br>1.24   | 1<br>0.06     | 16<br>0.76   | 0<br>0       | 2<br>0.4      | 15<br>1.45   | 150 |
| LAX | 0<br>(0)       | 257<br>(1.65) | 217<br>(2.33) | 12<br>(0.75)  | 18<br>(0.86) | 9<br>(0.87)  | 1<br>(0.2)    | 0<br>(0)     | 257 |
| MAL | 828<br>(3.56)  | 568<br>(3.64) | 331<br>(3.55) | 109<br>(6.85) | 56<br>(2.67) | 33<br>(3.19) | 0<br>(0)      | 39<br>(3.76) | 568 |
| MAY | 743<br>(3.2)   | 777<br>(4.98) | 552<br>(5.92) | 41<br>(2.58)  | 98<br>(4.67) | 32<br>(3.1)  | 41<br>(8.12)  | 13<br>(1.25) | 777 |
| MCC | 69<br>(0.3)    | 57<br>(0.37)  | 34<br>(0.36)  | 7<br>(0.44)   | 7<br>(0.33)  | 6<br>(0.58)  | 2<br>(0.4)    | 1<br>(0.1)   | 57  |
| MDA | 384            | 312           | 190           | 27            | 28           | 4            | 57            | 6            | 312 |

|     |        |        |        |        |        |        |         |        |     |
|-----|--------|--------|--------|--------|--------|--------|---------|--------|-----|
|     | (1.65) | (2)    | (2.04) | (1.7)  | (1.33) | (0.39) | (11.29) | (0.58) |     |
| MSK | 593    | 450    | 367    | 0      | 19     | 18     | 26      | 20     | 450 |
|     | (2.55) | (2.89) | (3.93) | (0)    | (0.91) | (1.74) | (5.15)  | (1.93) |     |
| NCO | 792    | 799    | 524    | 83     | 113    | 79     | 0       | 0      | 799 |
|     | (3.41) | (5.12) | (5.62) | (5.21) | (5.38) | (7.65) | (0)     | (0)    |     |
| NEC | 1009   | 904    | 521    | 112    | 130    | 102    | 19      | 20     | 904 |
|     | (4.34) | (5.8)  | (5.58) | (7.04) | (6.19) | (9.87) | (3.76)  | (1.93) |     |
| NHS | 425    | 134    | 78     | 17     | 14     | 6      | 5       | 14     | 134 |
|     | (1.83) | (0.86) | (0.84) | (1.07) | (0.67) | (0.58) | (0.99)  | (1.35) |     |
| NJO | 181    | 169    | 100    | 7      | 27     | 20     | 7       | 8      | 169 |
|     | (0.78) | (1.08) | (1.07) | (0.44) | (1.29) | (1.94) | (1.39)  | (0.77) |     |
| NOR | 371    | 246    | 139    | 18     | 27     | 11     | 17      | 34     | 246 |
|     | (1.6)  | (1.58) | (1.49) | (1.13) | (1.29) | (1.06) | (3.37)  | (3.28) |     |
| NTH | 323    | 248    | 117    | 34     | 64     | 20     | 3       | 10     | 248 |
|     | (1.39) | (1.59) | (1.25) | (2.14) | (3.05) | (1.94) | (0.59)  | (0.96) |     |
| ORE | 0      | 65     | 48     | 4      | 4      | 2      | 5       | 2      | 65  |
|     | (0)    | (0.42) | (0.51) | (0.25) | (0.19) | (0.19) | (0.99)  | (0.19) |     |
| OVA | 748    | 764    | 427    | 95     | 105    | 57     | 8       | 72     | 764 |
|     | (3.22) | (4.9)  | (4.58) | (5.97) | (5)    | (5.52) | (1.58)  | (6.94) |     |

|     |                 |                |               |                |                |                |              |                |      |
|-----|-----------------|----------------|---------------|----------------|----------------|----------------|--------------|----------------|------|
| POC | 417<br>(1.79)   | 362<br>(2.32)  | 200<br>(2.14) | 33<br>(2.07)   | 39<br>(1.86)   | 9<br>(0.87)    | 0<br>(0)     | 81<br>(7.81)   | 362  |
| POL | 223<br>(0.96)   | 211<br>(1.35)  | 106<br>(1.14) | 17<br>(1.07)   | 37<br>(1.76)   | 10<br>(0.97)   | 41<br>(8.12) | 0<br>(0)       | 211  |
| PVD | 0<br>(0)        | 163<br>(1.05)  | 128<br>(1.37) | 10<br>(0.63)   | 14<br>(0.67)   | 8<br>(0.77)    | 0<br>(0)     | 3<br>(0.29)    | 163  |
| RMH | 0<br>(0)        | 144<br>(0.92)  | 49<br>(0.53)  | 16<br>(1.01)   | 27<br>(1.29)   | 17<br>(1.65)   | 9<br>(1.78)  | 26<br>(2.51)   | 144  |
| SEA | 5770<br>(24.83) | 1464<br>(9.39) | 605<br>(6.48) | 193<br>(12.12) | 228<br>(10.86) | 145<br>(14.04) | 44<br>(8.71) | 249<br>(24.01) | 1464 |
| SOC | 0<br>(0)        | 274<br>(1.76)  | 108<br>(1.16) | 46<br>(2.89)   | 62<br>(2.95)   | 11<br>(1.06)   | 13<br>(2.57) | 34<br>(3.28)   | 274  |
| SRO | 0<br>(0)        | 132<br>(0.85)  | 92<br>(0.99)  | 3<br>(0.19)    | 17<br>(0.81)   | 8<br>(0.77)    | 2<br>(0.4)   | 10<br>(0.96)   | 132  |
| STA | 349<br>(1.5)    | 267<br>(1.71)  | 160<br>(1.71) | 19<br>(1.19)   | 41<br>(1.95)   | 21<br>(2.03)   | 8<br>(1.58)  | 18<br>(1.74)   | 267  |
| TOR | 440<br>(1.89)   | 557<br>(3.57)  | 339<br>(3.63) | 39<br>(2.45)   | 132<br>(6.29)  | 34<br>(3.29)   | 5<br>(0.99)  | 8<br>(0.77)    | 557  |

|              |                |               |               |               |               |              |              |              |              |
|--------------|----------------|---------------|---------------|---------------|---------------|--------------|--------------|--------------|--------------|
| UCI          | 367<br>(1.58)  | 415<br>(2.66) | 252<br>(2.7)  | 73<br>(4.59)  | 48<br>(2.29)  | 23<br>(2.23) | 0<br>(0)     | 19<br>(1.83) | 415          |
| UKO          | 1104<br>(4.75) | 650<br>(4.17) | 353<br>(3.78) | 75<br>(4.71)  | 113<br>(5.38) | 65<br>(6.29) | 26<br>(5.15) | 18<br>(1.74) | 650          |
| UKR          | 0<br>(0)       | 47<br>(0.3)   | 23<br>(0.25)  | 3<br>(0.19)   | 6<br>(0.29)   | 2<br>(0.19)  | 1<br>(0.2)   | 12<br>(1.16) | 47           |
| USC          | 1047<br>(4.51) | 822<br>(5.27) | 539<br>(5.78) | 103<br>(6.47) | 79<br>(3.76)  | 35<br>(3.39) | 0<br>(0)     | 66<br>(6.36) | 822          |
| WOC          | 204<br>(0.88)  | 203<br>(1.3)  | 132<br>(1.41) | 10<br>(0.63)  | 20<br>(0.95)  | 17<br>(1.65) | 11<br>(2.18) | 13<br>(1.25) | 203          |
| <b>Total</b> | <b>23236</b>   | <b>15596</b>  | <b>9330</b>   | <b>1592</b>   | <b>2099</b>   | <b>1033</b>  | <b>505</b>   | <b>1037</b>  | <b>15596</b> |

---

Note: Additional SNPs lying within 30,000 bp upstream and downstream of Treg related genes are not included.
